# Supplementary material for: Composition of the Solvation Shell of the Selected Cyclic Ethers (1,4-Dioxane, 12-Crown-4, 15-Crown-5 and 18-Crown-6) in a Mixture of Formamide with Water at Four Temperatures
Source: MDPI journal article supplement (doi:10.3390/molecules28052169), 2023-02-26
Supplement: s1 [file s1]

Composition of the solvation shell of the selected cyclic ethers (1,4-dioxane, 12-crown-4, 15-crown-5 and 18-crown-6) in a mixture of formamide with water at four temperature

Małgorzata Jóźwiak<sup>\*a</sup>, Monika A. Trzmielak<sup>a</sup>, Michał Wasiak<sup>a</sup>, Katarzyna Łudzik-Dychto<sup>a</sup>

<sup>a</sup>University of Lodz, Faculty of Chemistry, Department of Physical Chemistry, Pomorska 165, 90–236 Lodz, Poland

\*corresponding author: malgorzata.jozwiak@chemia.uni.lodz.pl

## **Supplementary Materials**

**Table S1.** Total number of water (W) and formamide (F) molecules in the solvation sphere of 1,4-dioxane  $r = (r_W + r_F)$ , mole fraction of formamide (F) in the solvation sphere of the solute ( $y_F$ ), entropic factor of the transfer entropy of 1,4-dioxane in the process of preferential solvation at  $T = 293.15$  K in dependency of the mole fraction of water ( $x_W$ ) or formamide ( $x_F$ ) in the mixture F + W.

| 1,4-dioxane                                 |     |       |       |       |       |                                                                                             |                                                                                             |            |
|---------------------------------------------|-----|-------|-------|-------|-------|---------------------------------------------------------------------------------------------|---------------------------------------------------------------------------------------------|------------|
| formamide (F) + water (W) at $T = 293.15$ K |     |       |       |       |       |                                                                                             |                                                                                             |            |
| $x_W$                                       | $r$ | $r_W$ | $r_F$ | $x_F$ | $y_F$ | $T\Delta_{tr}S / \text{kJ} \cdot \text{mol}^{-1}$<br>(W $\rightarrow$ F + W) <sub>(B)</sub> | $T\Delta_{tr}S / \text{kJ} \cdot \text{mol}^{-1}$<br>(W $\rightarrow$ F + W) <sub>(A)</sub> | $\delta^a$ |
| 0.000                                       | 3.8 | 0.000 | 3.800 | 1.000 | 1.000 | 0.00                                                                                        | 0.00                                                                                        | 0.00       |
| 0.100                                       | 3.8 | 0.063 | 3.737 | 0.900 | 0.983 | -0.53                                                                                       | -0.53                                                                                       | 0.00       |
| 0.200                                       | 3.8 | 0.139 | 3.661 | 0.800 | 0.963 | -1.08                                                                                       | -1.08                                                                                       | 0.00       |
| 0.300                                       | 3.8 | 0.232 | 3.568 | 0.700 | 0.939 | -1.65                                                                                       | -1.65                                                                                       | 0.00       |
| 0.400                                       | 3.8 | 0.349 | 3.451 | 0.600 | 0.908 | -2.23                                                                                       | -2.23                                                                                       | 0.00       |
| 0.500                                       | 3.8 | 0.501 | 3.299 | 0.500 | 0.868 | -2.81                                                                                       | -2.81                                                                                       | 0.00       |
| 0.600                                       | 3.8 | 0.704 | 3.096 | 0.400 | 0.815 | -3.35                                                                                       | -3.35                                                                                       | 0.00       |
| 0.700                                       | 3.8 | 0.992 | 2.808 | 0.300 | 0.739 | -3.79                                                                                       | -3.78                                                                                       | -0.01      |
| 0.800                                       | 3.8 | 1.432 | 2.368 | 0.200 | 0.623 | -3.93                                                                                       | -3.93                                                                                       | 0.00       |
| 0.900                                       | 3.8 | 2.189 | 1.611 | 0.100 | 0.424 | -3.29                                                                                       | -3.29                                                                                       | 0.00       |
| 0.920                                       | 3.8 | 2.411 | 1.389 | 0.080 | 0.366 | -2.96                                                                                       | -2.96                                                                                       | 0.00       |
| 0.940                                       | 3.8 | 2.670 | 1.130 | 0.060 | 0.297 | -2.51                                                                                       | -2.51                                                                                       | 0.00       |
| 0.960                                       | 3.8 | 2.977 | 0.823 | 0.040 | 0.217 | -1.91                                                                                       | -1.91                                                                                       | 0.00       |
| 0.980                                       | 3.8 | 3.347 | 0.453 | 0.020 | 0.119 | -1.10                                                                                       | -1.10                                                                                       | 0.00       |
| 1.000                                       | 3.8 | 3.800 | 0.000 | 0.000 | 0.000 | 0.00                                                                                        | 0.00                                                                                        | 0.00       |

$$^a\delta = T\Delta_{tr}S(W \rightarrow F + W)_{(B)} - T\Delta_{tr}S(W \rightarrow F + W)_{(A)}$$

**Table S2.** Total number of water (W) and formamide (F) molecules in the solvation sphere of 1,4-dioxane  $r = (r_W + r_F)$ , mole fraction of formamide (F) in the solvation sphere of the solute ( $y_F$ ), entropic factor of the transfer entropy of 1,4-dioxane in the process of preferential solvation at  $T = 298.15$  K in dependency of the mole fraction of water ( $x_W$ ) or formamide ( $x_F$ ) in the mixture F + W.

| 1,4-dioxane                                 |     |       |       |       |       |                                                                                             |                                                                                             |            |
|---------------------------------------------|-----|-------|-------|-------|-------|---------------------------------------------------------------------------------------------|---------------------------------------------------------------------------------------------|------------|
| formamide (F) + water (W) at $T = 298.15$ K |     |       |       |       |       |                                                                                             |                                                                                             |            |
| $x_W$                                       | $r$ | $r_W$ | $r_F$ | $x_F$ | $y_F$ | $T\Delta_{tr}S / \text{kJ} \cdot \text{mol}^{-1}$<br>(W $\rightarrow$ F + W) <sub>(B)</sub> | $T\Delta_{tr}S / \text{kJ} \cdot \text{mol}^{-1}$<br>(W $\rightarrow$ F + W) <sub>(A)</sub> | $\delta^a$ |
| 0.000                                       | 3.7 | 0.000 | 3.700 | 1.000 | 1.000 | 0.00                                                                                        | 0.00                                                                                        | 0.00       |
| 0.100                                       | 3.7 | 0.064 | 3.636 | 0.900 | 0.983 | -0.51                                                                                       | -0.51                                                                                       | 0.00       |
| 0.200                                       | 3.7 | 0.141 | 3.559 | 0.800 | 0.962 | -1.05                                                                                       | -1.05                                                                                       | 0.00       |
| 0.300                                       | 3.7 | 0.236 | 3.464 | 0.700 | 0.936 | -1.59                                                                                       | -1.59                                                                                       | 0.00       |
| 0.400                                       | 3.7 | 0.354 | 3.346 | 0.600 | 0.904 | -2.15                                                                                       | -2.15                                                                                       | 0.00       |
| 0.500                                       | 3.7 | 0.507 | 3.193 | 0.500 | 0.863 | -2.69                                                                                       | -2.69                                                                                       | 0.00       |
| 0.600                                       | 3.7 | 0.712 | 2.988 | 0.400 | 0.808 | -3.20                                                                                       | -3.20                                                                                       | 0.00       |
| 0.700                                       | 3.7 | 1.002 | 2.698 | 0.300 | 0.729 | -3.58                                                                                       | -3.58                                                                                       | 0.00       |
| 0.800                                       | 3.7 | 1.439 | 2.261 | 0.200 | 0.611 | -3.68                                                                                       | -3.69                                                                                       | 0.01       |
| 0.900                                       | 3.7 | 2.180 | 1.520 | 0.100 | 0.411 | -3.03                                                                                       | -3.03                                                                                       | 0.00       |
| 0.920                                       | 3.7 | 2.394 | 1.306 | 0.080 | 0.353 | -2.72                                                                                       | -2.72                                                                                       | 0.00       |
| 0.940                                       | 3.7 | 2.642 | 1.058 | 0.060 | 0.286 | -2.29                                                                                       | -2.29                                                                                       | 0.00       |
| 0.960                                       | 3.7 | 2.934 | 0.766 | 0.040 | 0.207 | -1.73                                                                                       | -1.73                                                                                       | 0.00       |
| 0.980                                       | 3.7 | 3.280 | 0.420 | 0.020 | 0.114 | -0.99                                                                                       | -0.99                                                                                       | 0.00       |
| 1.000                                       | 3.7 | 3.700 | 0.000 | 0.000 | 0.000 | 0.00                                                                                        | 0.00                                                                                        | 0.00       |

$$^a\delta = T\Delta_{tr}S(\text{W} \rightarrow \text{F} + \text{W})_{(B)} - T\Delta_{tr}S(\text{W} \rightarrow \text{F} + \text{W})_{(A)}$$

**Table S3.** Total number of water (W) and formamide (F) molecules in the solvation sphere of 1,4-dioxane  $r = (r_W + r_F)$ , mole fraction of formamide (F) in the solvation sphere of the solute ( $y_F$ ), entropic factor of the transfer entropy of 1,4-dioxane in the process of preferential solvation at  $T = 303.15$  K in dependency of the mole fraction of water ( $x_W$ ) or formamide ( $x_F$ ) in the mixture F + W.

| 1,4-dioxane                                 |     |       |       |       |       |                                                                                             |                                                                                             |            |
|---------------------------------------------|-----|-------|-------|-------|-------|---------------------------------------------------------------------------------------------|---------------------------------------------------------------------------------------------|------------|
| formamide (F) + water (W) at $T = 303.15$ K |     |       |       |       |       |                                                                                             |                                                                                             |            |
| $x_W$                                       | $r$ | $r_W$ | $r_F$ | $x_F$ | $y_F$ | $T\Delta_{tr}S / \text{kJ} \cdot \text{mol}^{-1}$<br>(W $\rightarrow$ F + W) <sub>(B)</sub> | $T\Delta_{tr}S / \text{kJ} \cdot \text{mol}^{-1}$<br>(W $\rightarrow$ F + W) <sub>(A)</sub> | $\delta^a$ |
| 0.000                                       | 3.6 | 0.000 | 3.600 | 1.000 | 1.000 | 0.00                                                                                        | 0.00                                                                                        | 0.00       |
| 0.100                                       | 3.6 | 0.062 | 3.538 | 0.900 | 0.983 | -0.51                                                                                       | -0.51                                                                                       | 0.00       |
| 0.200                                       | 3.6 | 0.136 | 3.464 | 0.800 | 0.962 | -1.04                                                                                       | -1.04                                                                                       | 0.00       |
| 0.300                                       | 3.6 | 0.227 | 3.373 | 0.700 | 0.937 | -1.58                                                                                       | -1.59                                                                                       | 0.01       |
| 0.400                                       | 3.6 | 0.342 | 3.258 | 0.600 | 0.905 | -2.14                                                                                       | -2.14                                                                                       | 0.00       |
| 0.500                                       | 3.6 | 0.490 | 3.110 | 0.500 | 0.864 | -2.68                                                                                       | -2.68                                                                                       | 0.00       |
| 0.600                                       | 3.6 | 0.689 | 2.911 | 0.400 | 0.809 | -3.18                                                                                       | -3.18                                                                                       | 0.00       |
| 0.700                                       | 3.6 | 0.970 | 2.630 | 0.300 | 0.731 | -3.56                                                                                       | -3.57                                                                                       | 0.01       |
| 0.800                                       | 3.6 | 1.396 | 2.204 | 0.200 | 0.612 | -3.67                                                                                       | -3.67                                                                                       | 0.00       |
| 0.900                                       | 3.6 | 2.117 | 1.483 | 0.100 | 0.412 | -3.02                                                                                       | -3.02                                                                                       | 0.00       |
| 0.920                                       | 3.6 | 2.326 | 1.274 | 0.080 | 0.354 | -2.70                                                                                       | -2.70                                                                                       | 0.00       |
| 0.940                                       | 3.6 | 2.568 | 1.032 | 0.060 | 0.287 | -2.28                                                                                       | -2.28                                                                                       | 0.00       |
| 0.960                                       | 3.6 | 2.852 | 0.748 | 0.040 | 0.208 | -1.72                                                                                       | -1.73                                                                                       | 0.01       |
| 0.980                                       | 3.6 | 3.190 | 0.410 | 0.020 | 0.114 | -0.99                                                                                       | -0.99                                                                                       | 0.00       |
| 1.000                                       | 3.6 | 3.600 | 0.000 | 0.000 | 0.000 | 0.00                                                                                        | 0.00                                                                                        | 0.00       |

$$^a\delta = T\Delta_{tr}S(W \rightarrow F + W)_{(B)} - T\Delta_{tr}S(W \rightarrow F + W)_{(A)}$$

**Table S4.** Total number of water (W) and formamide (F) molecules in the solvation sphere of 1,4-dioxane  $r = (r_W + r_F)$ , mole fraction of formamide (F) in the solvation sphere of the solute ( $y_F$ ), entropic factor of the transfer entropy of 1,4-dioxane in the process of preferential solvation at  $T = 308.15$  K in dependency of the mole fraction of water ( $x_W$ ) or formamide ( $x_F$ ) in the mixture F + W.

| 1,4-dioxane                                 |     |       |       |       |       |                                                                                             |                                                                                             |            |
|---------------------------------------------|-----|-------|-------|-------|-------|---------------------------------------------------------------------------------------------|---------------------------------------------------------------------------------------------|------------|
| formamide (F) + water (W) at $T = 308.15$ K |     |       |       |       |       |                                                                                             |                                                                                             |            |
| $x_W$                                       | $r$ | $r_W$ | $r_F$ | $x_F$ | $y_F$ | $T\Delta_{tr}S / \text{kJ} \cdot \text{mol}^{-1}$<br>(W $\rightarrow$ F + W) <sub>(B)</sub> | $T\Delta_{tr}S / \text{kJ} \cdot \text{mol}^{-1}$<br>(W $\rightarrow$ F + W) <sub>(A)</sub> | $\delta^a$ |
| 0.000                                       | 3.6 | 0.000 | 3.600 | 1.000 | 1.000 | 0.00                                                                                        | 0.00                                                                                        | 0.00       |
| 0.100                                       | 3.6 | 0.063 | 3.537 | 0.900 | 0.983 | -0.51                                                                                       | -0.51                                                                                       | 0.00       |
| 0.200                                       | 3.6 | 0.138 | 3.462 | 0.800 | 0.962 | -1.05                                                                                       | -1.05                                                                                       | 0.00       |
| 0.300                                       | 3.6 | 0.231 | 3.369 | 0.700 | 0.936 | -1.59                                                                                       | -1.59                                                                                       | 0.00       |
| 0.400                                       | 3.6 | 0.347 | 3.253 | 0.600 | 0.904 | -2.15                                                                                       | -2.15                                                                                       | 0.00       |
| 0.500                                       | 3.6 | 0.497 | 3.103 | 0.500 | 0.862 | -2.69                                                                                       | -2.69                                                                                       | 0.00       |
| 0.600                                       | 3.6 | 0.697 | 2.903 | 0.400 | 0.806 | -3.20                                                                                       | -3.19                                                                                       | -0.01      |
| 0.700                                       | 3.6 | 0.979 | 2.621 | 0.300 | 0.728 | -3.58                                                                                       | -3.58                                                                                       | 0.01       |
| 0.800                                       | 3.6 | 1.405 | 2.195 | 0.200 | 0.610 | -3.69                                                                                       | -3.68                                                                                       | -0.01      |
| 0.900                                       | 3.6 | 2.125 | 1.475 | 0.100 | 0.410 | -3.03                                                                                       | -3.03                                                                                       | 0.00       |
| 0.920                                       | 3.6 | 2.332 | 1.268 | 0.080 | 0.352 | -2.72                                                                                       | -2.72                                                                                       | 0.00       |
| 0.940                                       | 3.6 | 2.573 | 1.027 | 0.060 | 0.285 | -2.29                                                                                       | -2.30                                                                                       | 0.01       |
| 0.960                                       | 3.6 | 2.856 | 0.744 | 0.040 | 0.207 | -1.73                                                                                       | -1.73                                                                                       | 0.00       |
| 0.980                                       | 3.6 | 3.193 | 0.407 | 0.020 | 0.113 | -0.99                                                                                       | -0.99                                                                                       | 0.00       |
| 1.000                                       | 3.6 | 3.600 | 0.000 | 0.000 | 0.000 | 0.00                                                                                        | 0.00                                                                                        | 0.00       |

$$^a\delta = T\Delta_{tr}S(W \rightarrow F + W)_{(B)} - T\Delta_{tr}S(W \rightarrow F + W)_{(A)}$$

**Table S5.** Total number of water (W) and formamide (F) molecules in the solvation sphere of 12C4  $r = (r_W + r_F)$ , mole fraction of formamide (F) in the solvation sphere of the solute ( $y_F$ ), entropic factor of the transfer entropy of 12C4 in the process of preferential solvation at  $T = 293.15$  K in dependency of the mole fraction of water ( $x_W$ ) or formamide ( $x_F$ ) in the mixture F + W.

| 12-crown-4                                  |      |        |        |       |       |                                                                                             |                                                                                             |            |
|---------------------------------------------|------|--------|--------|-------|-------|---------------------------------------------------------------------------------------------|---------------------------------------------------------------------------------------------|------------|
| formamide (F) + water (W) at $T = 293.15$ K |      |        |        |       |       |                                                                                             |                                                                                             |            |
| $x_W$                                       | $r$  | $r_W$  | $r_F$  | $x_F$ | $y_F$ | $T\Delta_{tr}S / \text{kJ} \cdot \text{mol}^{-1}$<br>(W $\rightarrow$ F + W) <sub>(B)</sub> | $T\Delta_{tr}S / \text{kJ} \cdot \text{mol}^{-1}$<br>(W $\rightarrow$ F + W) <sub>(A)</sub> | $\delta^a$ |
| 0.000                                       | 13.1 | 0.000  | 13.100 | 1.000 | 1.000 | 0.00                                                                                        | 0.00                                                                                        | 0.00       |
| 0.100                                       | 13.1 | 0.353  | 12.747 | 0.900 | 0.973 | -1.30                                                                                       | -1.30                                                                                       | 0.00       |
| 0.200                                       | 13.1 | 0.768  | 12.332 | 0.800 | 0.941 | -2.59                                                                                       | -2.59                                                                                       | 0.00       |
| 0.300                                       | 13.1 | 1.264  | 11.836 | 0.700 | 0.904 | -3.87                                                                                       | -3.87                                                                                       | 0.00       |
| 0.400                                       | 13.1 | 1.867  | 11.233 | 0.600 | 0.857 | -5.08                                                                                       | -5.08                                                                                       | 0.00       |
| 0.500                                       | 13.1 | 2.614  | 10.486 | 0.500 | 0.800 | -6.17                                                                                       | -6.17                                                                                       | 0.00       |
| 0.600                                       | 13.1 | 3.566  | 9.534  | 0.400 | 0.728 | -7.04                                                                                       | -7.04                                                                                       | 0.00       |
| 0.700                                       | 13.1 | 4.819  | 8.281  | 0.300 | 0.632 | -7.48                                                                                       | -7.49                                                                                       | 0.01       |
| 0.800                                       | 13.1 | 6.544  | 6.556  | 0.200 | 0.500 | -7.15                                                                                       | -7.14                                                                                       | -0.01      |
| 0.900                                       | 13.1 | 9.065  | 4.035  | 0.100 | 0.308 | -5.26                                                                                       | -5.26                                                                                       | 0.00       |
| 0.920                                       | 13.1 | 9.715  | 3.385  | 0.080 | 0.258 | -4.57                                                                                       | -4.57                                                                                       | 0.00       |
| 0.940                                       | 13.1 | 10.432 | 2.668  | 0.060 | 0.204 | -3.73                                                                                       | -3.73                                                                                       | 0.01       |
| 0.960                                       | 13.1 | 11.226 | 1.874  | 0.040 | 0.143 | -2.71                                                                                       | -2.71                                                                                       | 0.00       |
| 0.980                                       | 13.1 | 12.110 | 0.990  | 0.020 | 0.076 | -1.48                                                                                       | -1.48                                                                                       | 0.00       |
| 1.000                                       | 13.1 | 13.100 | 0.000  | 0.000 | 0.000 | 0.00                                                                                        | 0.00                                                                                        | 0.00       |

$$^a\delta = T\Delta_{tr}S(\text{W} \rightarrow \text{F} + \text{W})_{(B)} - T\Delta_{tr}S(\text{W} \rightarrow \text{F} + \text{W})_{(A)}$$

**Table S6.** Total number of water (W) and formamide (F) molecules in the solvation sphere of 12C4  $r = (r_W + r_F)$ , mole fraction of formamide (F) in the solvation sphere of the solute ( $y_F$ ), entropic factor of the transfer entropy of 12C4 in the process of preferential solvation at  $T = 298.15$  K in dependency of the mole fraction of water ( $x_W$ ) or formamide ( $x_F$ ) in the mixture F + W.

| 12-crown-4                                  |      |        |        |       |       |                                                                                             |                                                                                             |            |
|---------------------------------------------|------|--------|--------|-------|-------|---------------------------------------------------------------------------------------------|---------------------------------------------------------------------------------------------|------------|
| formamide (F) + water (W) at $T = 298.15$ K |      |        |        |       |       |                                                                                             |                                                                                             |            |
| $x_W$                                       | $r$  | $r_W$  | $r_F$  | $x_F$ | $y_F$ | $T\Delta_{tr}S / \text{kJ} \cdot \text{mol}^{-1}$<br>(W $\rightarrow$ F + W) <sub>(B)</sub> | $T\Delta_{tr}S / \text{kJ} \cdot \text{mol}^{-1}$<br>(W $\rightarrow$ F + W) <sub>(A)</sub> | $\delta^a$ |
| 0.000                                       | 12.5 | 0.000  | 12.500 | 1.000 | 1.000 | 0.00                                                                                        | 0.00                                                                                        | 0.00       |
| 0.100                                       | 12.5 | 0.339  | 12.161 | 0.900 | 0.973 | -1.25                                                                                       | -1.25                                                                                       | 0.00       |
| 0.200                                       | 12.5 | 0.738  | 11.762 | 0.800 | 0.941 | -2.50                                                                                       | -2.50                                                                                       | 0.00       |
| 0.300                                       | 12.5 | 1.214  | 11.286 | 0.700 | 0.903 | -3.73                                                                                       | -3.73                                                                                       | 0.00       |
| 0.400                                       | 12.5 | 1.791  | 10.709 | 0.600 | 0.857 | -4.90                                                                                       | -4.90                                                                                       | 0.00       |
| 0.500                                       | 12.5 | 2.507  | 9.993  | 0.500 | 0.799 | -5.95                                                                                       | -5.95                                                                                       | 0.00       |
| 0.600                                       | 12.5 | 3.417  | 9.083  | 0.400 | 0.727 | -6.78                                                                                       | -6.78                                                                                       | 0.00       |
| 0.700                                       | 12.5 | 4.614  | 7.886  | 0.300 | 0.631 | -7.21                                                                                       | -7.21                                                                                       | 0.00       |
| 0.800                                       | 12.5 | 6.258  | 6.242  | 0.200 | 0.499 | -6.89                                                                                       | -6.89                                                                                       | 0.00       |
| 0.900                                       | 12.5 | 8.660  | 3.840  | 0.100 | 0.307 | -5.07                                                                                       | -5.07                                                                                       | 0.00       |
| 0.920                                       | 12.5 | 9.279  | 3.221  | 0.080 | 0.258 | -4.40                                                                                       | -4.40                                                                                       | 0.00       |
| 0.940                                       | 12.5 | 9.962  | 2.538  | 0.060 | 0.203 | -3.59                                                                                       | -3.59                                                                                       | 0.01       |
| 0.960                                       | 12.5 | 10.717 | 1.783  | 0.040 | 0.143 | -2.61                                                                                       | -2.62                                                                                       | 0.01       |
| 0.980                                       | 12.5 | 11.558 | 0.942  | 0.020 | 0.075 | -1.43                                                                                       | -1.43                                                                                       | 0.00       |
| 1.000                                       | 12.5 | 12.500 | 0.000  | 0.000 | 0.000 | 0.00                                                                                        | 0.00                                                                                        | 0.00       |

$$^a\delta = T\Delta_{tr}S(\text{W} \rightarrow \text{F} + \text{W})_{(B)} - T\Delta_{tr}S(\text{W} \rightarrow \text{F} + \text{W})_{(A)}$$

**Table S7.** Total number of water (W) and formamide (F) molecules in the solvation sphere of 12C4  $r = (r_W + r_F)$ , mole fraction of formamide (F) in the solvation sphere of the solute ( $y_F$ ), entropic factor of the transfer entropy of 12C4 in the process of preferential solvation at  $T = 303.15$  K in dependency of the mole fraction of water ( $x_W$ ) or formamide ( $x_F$ ) in the mixture F + W.

| 12-crown-4                                  |      |        |        |       |       |                                                                                             |                                                                                             |            |
|---------------------------------------------|------|--------|--------|-------|-------|---------------------------------------------------------------------------------------------|---------------------------------------------------------------------------------------------|------------|
| formamide (F) + water (W) at $T = 303.15$ K |      |        |        |       |       |                                                                                             |                                                                                             |            |
| $x_W$                                       | $r$  | $r_W$  | $r_F$  | $x_F$ | $y_F$ | $T\Delta_{tr}S / \text{kJ} \cdot \text{mol}^{-1}$<br>(W $\rightarrow$ F + W) <sub>(B)</sub> | $T\Delta_{tr}S / \text{kJ} \cdot \text{mol}^{-1}$<br>(W $\rightarrow$ F + W) <sub>(A)</sub> | $\delta^a$ |
| 0.000                                       | 11.7 | 0.000  | 11.700 | 1.000 | 1.000 | 0.00                                                                                        | 0.00                                                                                        | 0.00       |
| 0.100                                       | 11.7 | 0.317  | 11.383 | 0.900 | 0.973 | -1.19                                                                                       | -1.19                                                                                       | 0.00       |
| 0.200                                       | 11.7 | 0.689  | 11.011 | 0.800 | 0.941 | -2.38                                                                                       | -2.39                                                                                       | 0.01       |
| 0.300                                       | 11.7 | 1.134  | 10.566 | 0.700 | 0.903 | -3.55                                                                                       | -3.55                                                                                       | 0.00       |
| 0.400                                       | 11.7 | 1.674  | 10.026 | 0.600 | 0.857 | -4.67                                                                                       | -4.67                                                                                       | 0.00       |
| 0.500                                       | 11.7 | 2.343  | 9.357  | 0.500 | 0.800 | -5.67                                                                                       | -5.67                                                                                       | 0.00       |
| 0.600                                       | 11.7 | 3.194  | 8.506  | 0.400 | 0.727 | -6.47                                                                                       | -6.47                                                                                       | 0.00       |
| 0.700                                       | 11.7 | 4.314  | 7.386  | 0.300 | 0.631 | -6.88                                                                                       | -6.88                                                                                       | 0.00       |
| 0.800                                       | 11.7 | 5.853  | 5.847  | 0.200 | 0.500 | -6.57                                                                                       | -6.57                                                                                       | 0.00       |
| 0.900                                       | 11.7 | 8.102  | 3.598  | 0.100 | 0.308 | -4.83                                                                                       | -4.83                                                                                       | 0.00       |
| 0.920                                       | 11.7 | 8.683  | 3.017  | 0.080 | 0.258 | -4.20                                                                                       | -4.20                                                                                       | 0.00       |
| 0.940                                       | 11.7 | 9.322  | 2.378  | 0.060 | 0.203 | -3.43                                                                                       | -3.43                                                                                       | 0.00       |
| 0.960                                       | 11.7 | 10.030 | 1.670  | 0.040 | 0.143 | -2.49                                                                                       | -2.49                                                                                       | 0.00       |
| 0.980                                       | 11.7 | 10.818 | 0.882  | 0.020 | 0.075 | -1.36                                                                                       | -1.36                                                                                       | 0.00       |
| 1.000                                       | 11.7 | 11.700 | 0.000  | 0.000 | 0.000 | 0.00                                                                                        | 0.00                                                                                        | 0.00       |

$$^a\delta = T\Delta_{tr}S(\text{W} \rightarrow \text{F} + \text{W})_{(B)} - T\Delta_{tr}S(\text{W} \rightarrow \text{F} + \text{W})_{(A)}$$



**Table S8.** Total number of water (W) and formamide (F) molecules in the solvation sphere of 12C4  $r = (r_W + r_F)$ , mole fraction of formamide (F) in the solvation sphere of the solute ( $y_F$ ), entropic factor of the transfer entropy of 12C4 in the process of preferential solvation at  $T = 308.15$  K in dependency of the mole fraction of water ( $x_W$ ) or formamide ( $x_F$ ) in the mixture F + W.

| 12-crown-4                                  |      |        |        |       |       |                                                                                             |                                                                                             |            |
|---------------------------------------------|------|--------|--------|-------|-------|---------------------------------------------------------------------------------------------|---------------------------------------------------------------------------------------------|------------|
| formamide (F) + water (W) at $T = 308.15$ K |      |        |        |       |       |                                                                                             |                                                                                             |            |
| $x_W$                                       | $r$  | $r_W$  | $r_F$  | $x_F$ | $y_F$ | $T\Delta_{tr}S / \text{kJ} \cdot \text{mol}^{-1}$<br>(W $\rightarrow$ F + W) <sub>(B)</sub> | $T\Delta_{tr}S / \text{kJ} \cdot \text{mol}^{-1}$<br>(W $\rightarrow$ F + W) <sub>(A)</sub> | $\delta^a$ |
| 0.000                                       | 11.1 | 0.000  | 11.100 | 1.000 | 1.000 | 0.00                                                                                        | 0.00                                                                                        | 0.00       |
| 0.100                                       | 11.1 | 0.288  | 10.812 | 0.900 | 0.974 | -1.19                                                                                       | -1.19                                                                                       | 0.00       |
| 0.200                                       | 11.1 | 0.630  | 10.470 | 0.800 | 0.943 | -2.38                                                                                       | -2.39                                                                                       | 0.01       |
| 0.300                                       | 11.1 | 1.038  | 10.062 | 0.700 | 0.906 | -3.56                                                                                       | -3.56                                                                                       | 0.00       |
| 0.400                                       | 11.1 | 1.534  | 9.566  | 0.600 | 0.862 | -4.70                                                                                       | -4.70                                                                                       | 0.00       |
| 0.500                                       | 11.1 | 2.153  | 8.947  | 0.500 | 0.806 | -5.72                                                                                       | -5.72                                                                                       | 0.00       |
| 0.600                                       | 11.1 | 2.943  | 8.157  | 0.400 | 0.735 | -6.55                                                                                       | -6.55                                                                                       | 0.00       |
| 0.700                                       | 11.1 | 3.990  | 7.110  | 0.300 | 0.641 | -7.00                                                                                       | -7.00                                                                                       | 0.00       |
| 0.800                                       | 11.1 | 5.442  | 5.658  | 0.200 | 0.510 | -6.74                                                                                       | -6.73                                                                                       | -0.01      |
| 0.900                                       | 11.1 | 7.591  | 3.509  | 0.100 | 0.316 | -5.01                                                                                       | -5.01                                                                                       | 0.00       |
| 0.920                                       | 11.1 | 8.151  | 2.949  | 0.080 | 0.266 | -4.36                                                                                       | -4.36                                                                                       | 0.00       |
| 0.940                                       | 11.1 | 8.771  | 2.329  | 0.060 | 0.210 | -3.57                                                                                       | -3.57                                                                                       | 0.00       |
| 0.960                                       | 11.1 | 9.460  | 1.640  | 0.040 | 0.148 | -2.60                                                                                       | -2.60                                                                                       | 0.00       |
| 0.980                                       | 11.1 | 10.231 | 0.869  | 0.020 | 0.078 | -1.43                                                                                       | -1.43                                                                                       | 0.00       |
| 1.000                                       | 11.1 | 11.100 | 0.000  | 0.000 | 0.000 | 0.00                                                                                        | 0.00                                                                                        | 0.00       |

$$^a\delta = T\Delta_{tr}S(\text{W} \rightarrow \text{F} + \text{W})_{(B)} - T\Delta_{tr}S(\text{W} \rightarrow \text{F} + \text{W})_{(A)}$$

**Table S9.** Total number of water (W) and formamide (F) molecules in the solvation sphere of 15C5  $r = (r_W + r_F)$ , mole fraction of formamide (F) in the solvation sphere of the solute ( $y_F$ ), entropic factor of the transfer entropy of 15C5 in the process of preferential solvation at  $T = 293.15$  K in dependency of the mole fraction of water ( $x_W$ ) or formamide ( $x_F$ ) in the mixture F + W.

| 15-crown-5                                  |      |        |        |       |       |                                                                                             |                                                                                             |            |
|---------------------------------------------|------|--------|--------|-------|-------|---------------------------------------------------------------------------------------------|---------------------------------------------------------------------------------------------|------------|
| formamide (F) + water (W) at $T = 293.15$ K |      |        |        |       |       |                                                                                             |                                                                                             |            |
| $x_W$                                       | $r$  | $r_W$  | $r_F$  | $x_F$ | $y_F$ | $T\Delta_{tr}S / \text{kJ} \cdot \text{mol}^{-1}$<br>(W $\rightarrow$ F + W) <sub>(B)</sub> | $T\Delta_{tr}S / \text{kJ} \cdot \text{mol}^{-1}$<br>(W $\rightarrow$ F + W) <sub>(A)</sub> | $\delta^a$ |
| 0.000                                       | 30.3 | 0.000  | 30.300 | 1.000 | 1.000 | 0.00                                                                                        | 0.00                                                                                        | 0.00       |
| 0.100                                       | 30.3 | 1.165  | 29.135 | 0.900 | 0.962 | -1.98                                                                                       | -1.98                                                                                       | 0.00       |
| 0.200                                       | 30.3 | 2.500  | 27.800 | 0.800 | 0.917 | -3.89                                                                                       | -3.89                                                                                       | 0.00       |
| 0.300                                       | 30.3 | 4.048  | 26.252 | 0.700 | 0.866 | -5.67                                                                                       | -5.66                                                                                       | -0.01      |
| 0.400                                       | 30.3 | 5.862  | 24.438 | 0.600 | 0.807 | -7.24                                                                                       | -7.24                                                                                       | 0.00       |
| 0.500                                       | 30.3 | 8.017  | 22.283 | 0.500 | 0.735 | -8.52                                                                                       | -8.52                                                                                       | 0.00       |
| 0.600                                       | 30.3 | 10.621 | 19.679 | 0.400 | 0.649 | -9.33                                                                                       | -9.33                                                                                       | 0.00       |
| 0.700                                       | 30.3 | 13.829 | 16.471 | 0.300 | 0.544 | -9.45                                                                                       | -9.45                                                                                       | 0.00       |
| 0.800                                       | 30.3 | 17.879 | 12.421 | 0.200 | 0.410 | -8.46                                                                                       | -8.46                                                                                       | 0.00       |
| 0.900                                       | 30.3 | 23.151 | 7.149  | 0.100 | 0.236 | -5.72                                                                                       | -5.72                                                                                       | 0.00       |
| 0.920                                       | 30.3 | 24.403 | 5.897  | 0.080 | 0.195 | -4.86                                                                                       | -4.86                                                                                       | 0.00       |
| 0.940                                       | 30.3 | 25.735 | 4.565  | 0.060 | 0.151 | -3.88                                                                                       | -3.88                                                                                       | 0.00       |
| 0.960                                       | 30.3 | 27.156 | 3.144  | 0.040 | 0.104 | -2.76                                                                                       | -2.76                                                                                       | 0.00       |
| 0.980                                       | 30.3 | 28.674 | 1.626  | 0.020 | 0.054 | -1.47                                                                                       | -1.47                                                                                       | 0.00       |
| 1.000                                       | 30.3 | 30.300 | 0.000  | 0.000 | 0.000 | 0.00                                                                                        | 0.00                                                                                        | 0.00       |

$$^a\delta = T\Delta_{tr}S(\text{W} \rightarrow \text{F} + \text{W})_{(B)} - T\Delta_{tr}S(\text{W} \rightarrow \text{F} + \text{W})_{(A)}$$

**Table S10.** Total number of water (W) and formamide (F) molecules in the solvation sphere of 15C5  $r = (r_W + r_F)$ , mole fraction of formamide (F) in the solvation sphere of the solute ( $y_F$ ), entropic factor of the transfer entropy of 15C5 in the process of preferential solvation at  $T = 298.15$  K in dependency of the mole fraction of water ( $x_W$ ) or formamide ( $x_F$ ) in the mixture F + W.

| 15-crown-5                                  |      |        |        |       |       |                                                                                             |                                                                                             |            |
|---------------------------------------------|------|--------|--------|-------|-------|---------------------------------------------------------------------------------------------|---------------------------------------------------------------------------------------------|------------|
| formamide (F) + water (W) at $T = 298.15$ K |      |        |        |       |       |                                                                                             |                                                                                             |            |
| $x_W$                                       | $r$  | $r_W$  | $r_F$  | $x_F$ | $y_F$ | $T\Delta_{tr}S / \text{kJ} \cdot \text{mol}^{-1}$<br>(W $\rightarrow$ F + W) <sub>(B)</sub> | $T\Delta_{tr}S / \text{kJ} \cdot \text{mol}^{-1}$<br>(W $\rightarrow$ F + W) <sub>(A)</sub> | $\delta^a$ |
| 0.000                                       | 26.0 | 0.000  | 26.000 | 1.000 | 1.000 | 0.00                                                                                        | 0.00                                                                                        | 0.00       |
| 0.100                                       | 26.0 | 0.946  | 25.054 | 0.900 | 0.964 | -1.87                                                                                       | -1.87                                                                                       | 0.00       |
| 0.200                                       | 26.0 | 2.036  | 23.964 | 0.800 | 0.922 | -3.68                                                                                       | -3.68                                                                                       | 0.00       |
| 0.300                                       | 26.0 | 3.305  | 22.695 | 0.700 | 0.873 | -5.38                                                                                       | -5.38                                                                                       | 0.00       |
| 0.400                                       | 26.0 | 4.802  | 21.198 | 0.600 | 0.815 | -6.91                                                                                       | -6.91                                                                                       | 0.00       |
| 0.500                                       | 26.0 | 6.595  | 19.405 | 0.500 | 0.746 | -8.18                                                                                       | -8.17                                                                                       | -0.01      |
| 0.600                                       | 26.0 | 8.779  | 17.221 | 0.400 | 0.662 | -9.02                                                                                       | -9.02                                                                                       | 0.00       |
| 0.700                                       | 26.0 | 11.499 | 14.501 | 0.300 | 0.558 | -9.20                                                                                       | -9.20                                                                                       | 0.00       |
| 0.800                                       | 26.0 | 14.981 | 11.019 | 0.200 | 0.424 | -8.33                                                                                       | -8.33                                                                                       | 0.00       |
| 0.900                                       | 26.0 | 19.594 | 6.406  | 0.100 | 0.246 | -5.70                                                                                       | -5.70                                                                                       | 0.00       |
| 0.920                                       | 26.0 | 20.703 | 5.297  | 0.080 | 0.204 | -4.86                                                                                       | -4.86                                                                                       | 0.00       |
| 0.940                                       | 26.0 | 21.889 | 4.111  | 0.060 | 0.158 | -3.89                                                                                       | -3.89                                                                                       | 0.00       |
| 0.960                                       | 26.0 | 23.161 | 2.839  | 0.040 | 0.109 | -2.77                                                                                       | -2.77                                                                                       | 0.00       |
| 0.980                                       | 26.0 | 24.527 | 1.473  | 0.020 | 0.057 | -1.48                                                                                       | -1.48                                                                                       | 0.00       |
| 1.000                                       | 26.0 | 26.000 | 0.000  | 0.000 | 0.000 | 0.00                                                                                        | 0.00                                                                                        | 0.00       |

$$^a\delta = T\Delta_{tr}S(\text{W} \rightarrow \text{F} + \text{W})_{(B)} - T\Delta_{tr}S(\text{W} \rightarrow \text{F} + \text{W})_{(A)}$$

**Table S11.** Total number of water (W) and formamide (F) molecules in the solvation sphere of 15C5  $r = (r_W + r_F)$ , mole fraction of formamide (F) in the solvation sphere of the solute ( $y_F$ ), entropic factor of the transfer entropy of 15C5 in the process of preferential solvation at  $T = 303.15$  K in dependency of the mole fraction of water ( $x_W$ ) or formamide ( $x_F$ ) in the mixture F + W.

| 15-crown-5                                  |      |        |        |       |       |                                                                                             |                                                                                             |            |
|---------------------------------------------|------|--------|--------|-------|-------|---------------------------------------------------------------------------------------------|---------------------------------------------------------------------------------------------|------------|
| formamide (F) + water (W) at $T = 303.15$ K |      |        |        |       |       |                                                                                             |                                                                                             |            |
| $x_W$                                       | $r$  | $r_W$  | $r_F$  | $x_F$ | $y_F$ | $T\Delta_{tr}S / \text{kJ} \cdot \text{mol}^{-1}$<br>(W $\rightarrow$ F + W) <sub>(B)</sub> | $T\Delta_{tr}S / \text{kJ} \cdot \text{mol}^{-1}$<br>(W $\rightarrow$ F + W) <sub>(A)</sub> | $\delta^a$ |
| 0.000                                       | 22.9 | 0.000  | 22.900 | 1.000 | 1.000 | 0.00                                                                                        | 0.00                                                                                        | 0.00       |
| 0.100                                       | 22.9 | 0.784  | 22.116 | 0.900 | 0.966 | -1.81                                                                                       | -1.81                                                                                       | 0.00       |
| 0.200                                       | 22.9 | 1.693  | 21.207 | 0.800 | 0.926 | -3.57                                                                                       | -3.58                                                                                       | 0.00       |
| 0.300                                       | 22.9 | 2.758  | 20.142 | 0.700 | 0.880 | -5.24                                                                                       | -5.25                                                                                       | 0.00       |
| 0.400                                       | 22.9 | 4.025  | 18.875 | 0.600 | 0.824 | -6.77                                                                                       | -6.76                                                                                       | 0.00       |
| 0.500                                       | 22.9 | 5.547  | 17.353 | 0.500 | 0.758 | -8.05                                                                                       | -8.05                                                                                       | 0.00       |
| 0.600                                       | 22.9 | 7.422  | 15.478 | 0.400 | 0.676 | -8.94                                                                                       | -8.94                                                                                       | 0.00       |
| 0.700                                       | 22.9 | 9.785  | 13.115 | 0.300 | 0.573 | -9.20                                                                                       | -9.20                                                                                       | 0.00       |
| 0.800                                       | 22.9 | 12.852 | 10.048 | 0.200 | 0.439 | -8.41                                                                                       | -8.41                                                                                       | 0.00       |
| 0.900                                       | 22.9 | 16.995 | 5.905  | 0.100 | 0.258 | -5.84                                                                                       | -5.84                                                                                       | 0.00       |
| 0.920                                       | 22.9 | 18.005 | 4.895  | 0.080 | 0.214 | -5.00                                                                                       | -5.00                                                                                       | 0.00       |
| 0.940                                       | 22.9 | 19.089 | 3.811  | 0.060 | 0.166 | -4.02                                                                                       | -4.02                                                                                       | 0.00       |
| 0.960                                       | 22.9 | 20.261 | 2.639  | 0.040 | 0.115 | -2.87                                                                                       | -2.87                                                                                       | 0.00       |
| 0.980                                       | 22.9 | 21.526 | 1.374  | 0.020 | 0.060 | -1.54                                                                                       | -1.54                                                                                       | 0.00       |
| 1.000                                       | 22.9 | 22.900 | 0.000  | 0.000 | 0.000 | 0.00                                                                                        | 0.00                                                                                        | 0.00       |

$$^a\delta = T\Delta_{tr}S(\text{W} \rightarrow \text{F} + \text{W})_{(B)} - T\Delta_{tr}S(\text{W} \rightarrow \text{F} + \text{W})_{(A)}$$

**Table S12.** Total number of water (W) and formamide (F) molecules in the solvation sphere of 15C5  $r = (r_W + r_F)$ , mole fraction of formamide (F) in the solvation sphere of the solute ( $y_F$ ), entropic factor of the transfer entropy of 15C5 in the process of preferential solvation at  $T = 308.15$  K in dependency of the mole fraction of water ( $x_W$ ) or formamide ( $x_F$ ) in the mixture F + W.

| 15-crown-5                                  |      |        |        |       |       |                                                                                             |                                                                                             |            |
|---------------------------------------------|------|--------|--------|-------|-------|---------------------------------------------------------------------------------------------|---------------------------------------------------------------------------------------------|------------|
| formamide (F) + water (W) at $T = 308.15$ K |      |        |        |       |       |                                                                                             |                                                                                             |            |
| $x_W$                                       | $r$  | $r_W$  | $r_F$  | $x_F$ | $y_F$ | $T\Delta_{tr}S / \text{kJ} \cdot \text{mol}^{-1}$<br>(W $\rightarrow$ F + W) <sub>(B)</sub> | $T\Delta_{tr}S / \text{kJ} \cdot \text{mol}^{-1}$<br>(W $\rightarrow$ F + W) <sub>(A)</sub> | $\delta^a$ |
| 0.000                                       | 20.3 | 0.000  | 20.300 | 1.000 | 1.000 | 0.00                                                                                        | 0.00                                                                                        | 0.00       |
| 0.100                                       | 20.3 | 0.654  | 19.646 | 0.900 | 0.968 | -1.75                                                                                       | -1.76                                                                                       | 0.01       |
| 0.200                                       | 20.3 | 1.417  | 18.883 | 0.800 | 0.930 | -3.47                                                                                       | -3.47                                                                                       | 0.00       |
| 0.300                                       | 20.3 | 2.315  | 17.985 | 0.700 | 0.886 | -5.12                                                                                       | -5.12                                                                                       | 0.00       |
| 0.400                                       | 20.3 | 3.385  | 16.915 | 0.600 | 0.833 | -6.65                                                                                       | -6.64                                                                                       | -0.01      |
| 0.500                                       | 20.3 | 4.687  | 15.613 | 0.500 | 0.769 | -7.95                                                                                       | -7.95                                                                                       | 0.00       |
| 0.600                                       | 20.3 | 6.302  | 13.998 | 0.400 | 0.690 | -8.89                                                                                       | -8.89                                                                                       | 0.00       |
| 0.700                                       | 20.3 | 8.361  | 11.939 | 0.300 | 0.588 | -9.23                                                                                       | -9.23                                                                                       | 0.00       |
| 0.800                                       | 20.3 | 11.075 | 9.225  | 0.200 | 0.454 | -8.54                                                                                       | -8.54                                                                                       | 0.00       |
| 0.900                                       | 20.3 | 14.813 | 5.487  | 0.100 | 0.270 | -6.01                                                                                       | -6.02                                                                                       | 0.01       |
| 0.920                                       | 20.3 | 15.738 | 4.562  | 0.080 | 0.225 | -5.17                                                                                       | -5.17                                                                                       | 0.00       |
| 0.940                                       | 20.3 | 16.739 | 3.561  | 0.060 | 0.175 | -4.17                                                                                       | -4.17                                                                                       | 0.00       |
| 0.960                                       | 20.3 | 17.825 | 2.475  | 0.040 | 0.122 | -2.99                                                                                       | -2.99                                                                                       | 0.00       |
| 0.980                                       | 20.3 | 19.006 | 1.294  | 0.020 | 0.064 | -1.62                                                                                       | -1.62                                                                                       | 0.00       |
| 1.000                                       | 20.3 | 20.300 | 0.000  | 0.000 | 0.000 | 0.00                                                                                        | 0.00                                                                                        | 0.00       |

$$^a\delta = T\Delta_{tr}S(\text{W} \rightarrow \text{F} + \text{W})_{(B)} - T\Delta_{tr}S(\text{W} \rightarrow \text{F} + \text{W})_{(A)}$$

**Table S13.** Total number of water (W) and formamide (F) molecules in the solvation sphere of 18C6  $r = (r_W + r_F)$ , mole fraction of formamide (F) in the solvation sphere of the solute ( $y_F$ ), entropic factor of the transfer entropy of 18C6 in the process of preferential solvation at  $T = 293.15$  K in dependency of the mole fraction of water ( $x_W$ ) or formamide ( $x_F$ ) in the mixture F + W.

| 18-crown-6                                  |      |        |        |       |       |                                                                                             |                                                                                             |            |
|---------------------------------------------|------|--------|--------|-------|-------|---------------------------------------------------------------------------------------------|---------------------------------------------------------------------------------------------|------------|
| formamide (F) + water (W) at $T = 293.15$ K |      |        |        |       |       |                                                                                             |                                                                                             |            |
| $x_W$                                       | $r$  | $r_W$  | $r_F$  | $x_F$ | $y_F$ | $T\Delta_{tr}S / \text{kJ} \cdot \text{mol}^{-1}$<br>(W $\rightarrow$ F + W) <sub>(B)</sub> | $T\Delta_{tr}S / \text{kJ} \cdot \text{mol}^{-1}$<br>(W $\rightarrow$ F + W) <sub>(A)</sub> | $\delta^a$ |
| 0.000                                       | 61.3 | 0.000  | 61.300 | 1.000 | 1.000 | 0.00                                                                                        | 0.00                                                                                        | 0.00       |
| 0.100                                       | 61.3 | 2.855  | 58.445 | 0.900 | 0.953 | -2.89                                                                                       | -2.90                                                                                       | 0.01       |
| 0.200                                       | 61.3 | 6.076  | 55.224 | 0.800 | 0.901 | -5.59                                                                                       | -5.59                                                                                       | 0.00       |
| 0.300                                       | 61.3 | 9.726  | 51.574 | 0.700 | 0.841 | -8.02                                                                                       | -8.02                                                                                       | 0.00       |
| 0.400                                       | 61.3 | 13.902 | 47.398 | 0.600 | 0.773 | -10.07                                                                                      | -10.07                                                                                      | 0.00       |
| 0.500                                       | 61.3 | 18.731 | 42.569 | 0.500 | 0.694 | -11.60                                                                                      | -11.60                                                                                      | 0.00       |
| 0.600                                       | 61.3 | 24.373 | 36.927 | 0.400 | 0.602 | -12.41                                                                                      | -12.41                                                                                      | 0.00       |
| 0.700                                       | 61.3 | 31.051 | 30.249 | 0.300 | 0.493 | -12.21                                                                                      | -12.21                                                                                      | 0.00       |
| 0.800                                       | 61.3 | 39.089 | 22.211 | 0.200 | 0.362 | -10.56                                                                                      | -10.56                                                                                      | 0.00       |
| 0.900                                       | 61.3 | 48.941 | 12.359 | 0.100 | 0.202 | -6.83                                                                                       | -6.83                                                                                       | 0.00       |
| 0.920                                       | 61.3 | 51.183 | 10.117 | 0.080 | 0.165 | -5.76                                                                                       | -5.76                                                                                       | 0.00       |
| 0.940                                       | 61.3 | 53.533 | 7.767  | 0.060 | 0.127 | -4.55                                                                                       | -4.55                                                                                       | 0.00       |
| 0.960                                       | 61.3 | 55.996 | 5.304  | 0.040 | 0.087 | -3.19                                                                                       | -3.19                                                                                       | 0.00       |
| 0.980                                       | 61.3 | 58.581 | 2.719  | 0.020 | 0.044 | -1.68                                                                                       | -1.69                                                                                       | 0.01       |
| 1.000                                       | 61.3 | 61.300 | 0.000  | 0.000 | 0.000 | 0.00                                                                                        | 0.00                                                                                        | 0.00       |

$$^a\delta = T\Delta_{tr}S(\text{W} \rightarrow \text{F} + \text{W})_{(B)} - T\Delta_{tr}S(\text{W} \rightarrow \text{F} + \text{W})_{(A)}$$

**Table S14.** Total number of water (W) and formamide (F) molecules in the solvation sphere of 18C6  $r = (r_W + r_F)$ , mole fraction of formamide (F) in the solvation sphere of the solute ( $y_F$ ), entropic factor of the transfer entropy of 18C6 in the process of preferential solvation at  $T = 298.15$  K in dependency of the mole fraction of water ( $x_W$ ) or formamide ( $x_F$ ) in the mixture F + W.

| 18-crown-6                                  |      |        |        |       |       |                                                                                             |                                                                                             |            |
|---------------------------------------------|------|--------|--------|-------|-------|---------------------------------------------------------------------------------------------|---------------------------------------------------------------------------------------------|------------|
| formamide (F) + water (W) at $T = 298.15$ K |      |        |        |       |       |                                                                                             |                                                                                             |            |
| $x_W$                                       | $r$  | $r_W$  | $r_F$  | $x_F$ | $y_F$ | $T\Delta_{tr}S / \text{kJ} \cdot \text{mol}^{-1}$<br>(W $\rightarrow$ F + W) <sub>(B)</sub> | $T\Delta_{tr}S / \text{kJ} \cdot \text{mol}^{-1}$<br>(W $\rightarrow$ F + W) <sub>(A)</sub> | $\delta^a$ |
| 0.000                                       | 59.5 | 0.000  | 59.500 | 1.000 | 1.000 | 0.00                                                                                        | 0.00                                                                                        | 0.00       |
| 0.100                                       | 59.5 | 2.711  | 56.789 | 0.900 | 0.954 | -2.98                                                                                       | -2.98                                                                                       | 0.00       |
| 0.200                                       | 59.5 | 5.776  | 53.724 | 0.800 | 0.903 | -5.77                                                                                       | -5.77                                                                                       | 0.00       |
| 0.300                                       | 59.5 | 9.256  | 50.244 | 0.700 | 0.844 | -8.29                                                                                       | -8.30                                                                                       | 0.01       |
| 0.400                                       | 59.5 | 13.252 | 46.248 | 0.600 | 0.777 | -10.44                                                                                      | -10.44                                                                                      | 0.00       |
| 0.500                                       | 59.5 | 17.891 | 41.609 | 0.500 | 0.699 | -12.05                                                                                      | -12.05                                                                                      | 0.00       |
| 0.600                                       | 59.5 | 23.329 | 36.171 | 0.400 | 0.608 | -12.93                                                                                      | -12.93                                                                                      | 0.00       |
| 0.700                                       | 59.5 | 29.795 | 29.705 | 0.300 | 0.499 | -12.76                                                                                      | -12.76                                                                                      | 0.00       |
| 0.800                                       | 59.5 | 37.620 | 21.880 | 0.200 | 0.368 | -11.08                                                                                      | -11.09                                                                                      | 0.01       |
| 0.900                                       | 59.5 | 47.281 | 12.219 | 0.100 | 0.205 | -7.20                                                                                       | -7.20                                                                                       | 0.00       |
| 0.920                                       | 59.5 | 49.488 | 10.012 | 0.080 | 0.168 | -6.08                                                                                       | -6.08                                                                                       | 0.00       |
| 0.940                                       | 59.5 | 51.807 | 7.693  | 0.060 | 0.129 | -4.80                                                                                       | -4.81                                                                                       | 0.01       |
| 0.960                                       | 59.5 | 54.243 | 5.257  | 0.040 | 0.088 | -3.38                                                                                       | -3.38                                                                                       | 0.00       |
| 0.980                                       | 59.5 | 56.805 | 2.695  | 0.020 | 0.045 | -1.78                                                                                       | -1.78                                                                                       | 0.00       |
| 1.000                                       | 59.5 | 59.500 | 0.000  | 0.000 | 0.000 | 0.00                                                                                        | 0.00                                                                                        | 0.00       |

$$^a\delta = T\Delta_{tr}S(\text{W} \rightarrow \text{F} + \text{W})_{(B)} - T\Delta_{tr}S(\text{W} \rightarrow \text{F} + \text{W})_{(A)}$$

**Table S15.** Total number of water (W) and formamide (F) molecules in the solvation sphere of 18C6  $r = (r_W + r_F)$ , mole fraction of formamide (F) in the solvation sphere of the solute ( $y_F$ ), entropic factor of the transfer entropy of 18C6 in the process of preferential solvation at  $T = 303.15$  K in dependency of the mole fraction of water ( $x_W$ ) or formamide ( $x_F$ ) in the mixture F + W.

| 18-crown-6                                  |      |        |        |       |       |                                                                                             |                                                                                             |            |
|---------------------------------------------|------|--------|--------|-------|-------|---------------------------------------------------------------------------------------------|---------------------------------------------------------------------------------------------|------------|
| formamide (F) + water (W) at $T = 303.15$ K |      |        |        |       |       |                                                                                             |                                                                                             |            |
| $x_W$                                       | $r$  | $r_W$  | $r_F$  | $x_F$ | $y_F$ | $T\Delta_{tr}S / \text{kJ} \cdot \text{mol}^{-1}$<br>(W $\rightarrow$ F + W) <sub>(B)</sub> | $T\Delta_{tr}S / \text{kJ} \cdot \text{mol}^{-1}$<br>(W $\rightarrow$ F + W) <sub>(A)</sub> | $\delta^a$ |
| 0.000                                       | 57.6 | 0.000  | 57.600 | 1.000 | 1.000 | 0.00                                                                                        | 0.00                                                                                        | 0.00       |
| 0.100                                       | 57.6 | 2.629  | 54.971 | 0.900 | 0.954 | -2.93                                                                                       | -2.93                                                                                       | 0.00       |
| 0.200                                       | 57.6 | 5.591  | 52.009 | 0.800 | 0.903 | -5.68                                                                                       | -5.68                                                                                       | 0.00       |
| 0.300                                       | 57.6 | 8.963  | 48.637 | 0.700 | 0.844 | -8.16                                                                                       | -8.16                                                                                       | 0.00       |
| 0.400                                       | 57.6 | 12.832 | 44.768 | 0.600 | 0.777 | -10.27                                                                                      | -10.27                                                                                      | 0.00       |
| 0.500                                       | 57.6 | 17.321 | 40.279 | 0.500 | 0.699 | -11.86                                                                                      | -11.86                                                                                      | 0.00       |
| 0.600                                       | 57.6 | 22.587 | 35.013 | 0.400 | 0.608 | -12.72                                                                                      | -12.72                                                                                      | 0.00       |
| 0.700                                       | 57.6 | 28.848 | 28.752 | 0.300 | 0.499 | -12.55                                                                                      | -12.55                                                                                      | 0.00       |
| 0.800                                       | 57.6 | 36.424 | 21.176 | 0.200 | 0.368 | -10.90                                                                                      | -10.90                                                                                      | 0.00       |
| 0.900                                       | 57.6 | 45.775 | 11.825 | 0.100 | 0.205 | -7.09                                                                                       | -7.08                                                                                       | -0.01      |
| 0.920                                       | 57.6 | 47.911 | 9.689  | 0.080 | 0.168 | -5.98                                                                                       | -5.98                                                                                       | 0.00       |
| 0.940                                       | 57.6 | 50.155 | 7.445  | 0.060 | 0.129 | -4.73                                                                                       | -4.73                                                                                       | 0.00       |
| 0.960                                       | 57.6 | 52.513 | 5.087  | 0.040 | 0.088 | -3.32                                                                                       | -3.32                                                                                       | 0.00       |
| 0.980                                       | 57.6 | 54.991 | 2.609  | 0.020 | 0.045 | -1.75                                                                                       | -1.75                                                                                       | 0.00       |
| 1.000                                       | 57.6 | 57.600 | 0.000  | 0.000 | 0.000 | 0.00                                                                                        | 0.00                                                                                        | 0.00       |

$$^a\delta = T\Delta_{tr}S(\text{W} \rightarrow \text{F} + \text{W})_{(B)} - T\Delta_{tr}S(\text{W} \rightarrow \text{F} + \text{W})_{(A)}$$



**Table S16.** Total number of water (W) and formamide (F) molecules in the solvation sphere of 18C6  $r = (r_W + r_F)$ , mole fraction of formamide (F) in the solvation sphere of the solute ( $y_F$ ), entropic factor of the transfer entropy of 18C6 in the process of preferential solvation at  $T = 308.15$  K in dependency of the mole fraction of water ( $x_W$ ) or formamide ( $x_F$ ) in the mixture F + W.

| 18-crown-6                                  |      |        |        |       |       |                                                                                             |                                                                                             |            |
|---------------------------------------------|------|--------|--------|-------|-------|---------------------------------------------------------------------------------------------|---------------------------------------------------------------------------------------------|------------|
| formamide (F) + water (W) at $T = 308.15$ K |      |        |        |       |       |                                                                                             |                                                                                             |            |
| $x_W$                                       | $r$  | $r_W$  | $r_F$  | $x_F$ | $y_F$ | $T\Delta_{tr}S / \text{kJ} \cdot \text{mol}^{-1}$<br>(W $\rightarrow$ F + W) <sub>(B)</sub> | $T\Delta_{tr}S / \text{kJ} \cdot \text{mol}^{-1}$<br>(W $\rightarrow$ F + W) <sub>(A)</sub> | $\delta^a$ |
| 0.000                                       | 55.9 | 0.000  | 55.900 | 1.000 | 1.000 | 0.00                                                                                        | 0.00                                                                                        | 0.00       |
| 0.100                                       | 55.9 | 2.491  | 53.409 | 0.900 | 0.955 | -3.02                                                                                       | -3.02                                                                                       | 0.00       |
| 0.200                                       | 55.9 | 5.311  | 50.589 | 0.800 | 0.905 | -5.85                                                                                       | -5.85                                                                                       | 0.00       |
| 0.300                                       | 55.9 | 8.525  | 47.375 | 0.700 | 0.847 | -8.43                                                                                       | -8.43                                                                                       | 0.00       |
| 0.400                                       | 55.9 | 12.228 | 43.672 | 0.600 | 0.781 | -10.63                                                                                      | -10.63                                                                                      | 0.00       |
| 0.500                                       | 55.9 | 16.531 | 39.369 | 0.500 | 0.704 | -12.31                                                                                      | -12.31                                                                                      | 0.00       |
| 0.600                                       | 55.9 | 21.603 | 34.297 | 0.400 | 0.614 | -13.24                                                                                      | -13.24                                                                                      | 0.00       |
| 0.700                                       | 55.9 | 27.666 | 28.234 | 0.300 | 0.505 | -13.11                                                                                      | -13.11                                                                                      | 0.00       |
| 0.800                                       | 55.9 | 35.041 | 20.859 | 0.200 | 0.373 | -11.43                                                                                      | -11.43                                                                                      | 0.00       |
| 0.900                                       | 55.9 | 44.202 | 11.698 | 0.100 | 0.209 | -7.47                                                                                       | -7.47                                                                                       | 0.00       |
| 0.920                                       | 55.9 | 46.311 | 9.589  | 0.080 | 0.172 | -6.31                                                                                       | -6.30                                                                                       | -0.01      |
| 0.940                                       | 55.9 | 48.525 | 7.375  | 0.060 | 0.132 | -4.99                                                                                       | -4.99                                                                                       | 0.00       |
| 0.960                                       | 55.9 | 50.853 | 5.047  | 0.040 | 0.090 | -3.51                                                                                       | -3.52                                                                                       | 0.01       |
| 0.980                                       | 55.9 | 53.311 | 2.589  | 0.020 | 0.046 | -1.86                                                                                       | -1.85                                                                                       | -0.01      |
| 1.000                                       | 55.9 | 55.900 | 0.000  | 0.000 | 0.000 | 0.00                                                                                        | 0.00                                                                                        | 0.00       |

$$^a\delta = T\Delta_{tr}S(\text{W} \rightarrow \text{F} + \text{W})_{(B)} - T\Delta_{tr}S(\text{W} \rightarrow \text{F} + \text{W})_{(A)}$$
